# Supplementary material for: Origin and evolution of the octoploid strawberry genome
Source: PubMed Central journal article supplement (PMC6882729; doi:10.1038/s41588-019-0356-4), 2019-02-25
Supplement: 41588_2019_356_MOESM2_ESM.pdf [file 41588_2019_356_MOESM2_ESM.pdf]

## Reporting Summary

Nature Research wishes to improve the reproducibility of the work that we publish. This form provides structure for consistency and transparency in reporting. For further information on Nature Research policies, see [Authors & Referees](#) and the [Editorial Policy Checklist](#).

### Statistical parameters

When statistical analyses are reported, confirm that the following items are present in the relevant location (e.g. figure legend, table legend, main text, or Methods section).

n/a Confirmed

- The exact sample size ( $n$ ) for each experimental group/condition, given as a discrete number and unit of measurement
- An indication of whether measurements were taken from distinct samples or whether the same sample was measured repeatedly
- The statistical test(s) used AND whether they are one- or two-sided  
*Only common tests should be described solely by name; describe more complex techniques in the Methods section.*
- A description of all covariates tested
- A description of any assumptions or corrections, such as tests of normality and adjustment for multiple comparisons
- A full description of the statistics including central tendency (e.g. means) or other basic estimates (e.g. regression coefficient) AND variation (e.g. standard deviation) or associated estimates of uncertainty (e.g. confidence intervals)
- For null hypothesis testing, the test statistic (e.g.  $F$ ,  $t$ ,  $r$ ) with confidence intervals, effect sizes, degrees of freedom and  $P$  value noted  
*Give  $P$  values as exact values whenever suitable.*
- For Bayesian analysis, information on the choice of priors and Markov chain Monte Carlo settings
- For hierarchical and complex designs, identification of the appropriate level for tests and full reporting of outcomes
- Estimates of effect sizes (e.g. Cohen's  $d$ , Pearson's  $r$ ), indicating how they were calculated
- Clearly defined error bars  
*State explicitly what error bars represent (e.g. SD, SE, CI)*

*Our web collection on [statistics for biologists](#) may be useful.*

### Software and code

Policy information about [availability of computer code](#)

Data collection

All commercial DNA and RNA sequencing platforms used in this study are fully described.

Data analysis

All commercial and custom software used in this study for data analysis is fully described including specifying versions used. All custom software developed for this study has already been deposited on Github with weblinks (e.g. Phylogenetic iDentification of Subgenomes; <https://github.com/mrmckain/PhyDS>).

For manuscripts utilizing custom algorithms or software that are central to the research but not yet described in published literature, software must be made available to editors/reviewers upon request. We strongly encourage code deposition in a community repository (e.g. GitHub). See the Nature Research [guidelines for submitting code & software](#) for further information.

### Data

Policy information about [availability of data](#)

All manuscripts must include a [data availability statement](#). This statement should provide the following information, where applicable:

- Accession codes, unique identifiers, or web links for publicly available datasets
- A list of figures that have associated raw data
- A description of any restrictions on data availability

The genome assembly, annotations, and other supporting data will be made available on Dryad (<http://datadryad.org/resource/doi:10.5061/dryad.km0s7k0>).

Genome assembly and annotation will also be made publicly available on the Genome Database for Rosaceae (<https://www.rosaceae.org/>) and the CyVerse CoGe platform (<https://genomevolution.org/coge/>). The raw sequence data will be deposited in the Short Read Archive under NCBI BioProject PRJNA508389. No data restrictions.

## Field-specific reporting

Please select the best fit for your research. If you are not sure, read the appropriate sections before making your selection.

Life sciences       Behavioural & social sciences       Ecological, evolutionary & environmental sciences

For a reference copy of the document with all sections, see [nature.com/authors/policies/ReportingSummary-flat.pdf](https://nature.com/authors/policies/ReportingSummary-flat.pdf)

## Life sciences study design

All studies must disclose on these points even when the disclosure is negative.

|                 |                                                                                                                                                                                                                                                    |
|-----------------|----------------------------------------------------------------------------------------------------------------------------------------------------------------------------------------------------------------------------------------------------|
| Sample size     | A single polyploid genome was sequenced; comparing the expression of all syntenic homoeologous genes across all four subgenomes.                                                                                                                   |
| Data exclusions | No data was excluded from any analysis, unless described in the manuscript.                                                                                                                                                                        |
| Replication     | Flow cytometry measurements were replicated four times. Bootstrapping for phylogenetic analyses were replicated 500 times. Gene expression was compared across all four subgenomes with three distinct tissues to serve as independent replicates. |
| Randomization   | Randomizations were not needed for this study, which involved analyzing subgenomes residing within a nucleus of a single genotype. Plants were grown in a sterile growth chamber.                                                                  |
| Blinding        | A blinded-experiment is not possible for genome analyses.                                                                                                                                                                                          |

## Reporting for specific materials, systems and methods

### Materials & experimental systems

|                                     |                                                                 |
|-------------------------------------|-----------------------------------------------------------------|
| n/a                                 | Involvement in the study                                        |
| <input type="checkbox"/>            | <input checked="" type="checkbox"/> Unique biological materials |
| <input checked="" type="checkbox"/> | <input type="checkbox"/> Antibodies                             |
| <input checked="" type="checkbox"/> | <input type="checkbox"/> Eukaryotic cell lines                  |
| <input checked="" type="checkbox"/> | <input type="checkbox"/> Palaeontology                          |
| <input checked="" type="checkbox"/> | <input type="checkbox"/> Animals and other organisms            |
| <input checked="" type="checkbox"/> | <input type="checkbox"/> Human research participants            |

### Methods

|                                     |                                                    |
|-------------------------------------|----------------------------------------------------|
| n/a                                 | Involvement in the study                           |
| <input checked="" type="checkbox"/> | <input type="checkbox"/> ChIP-seq                  |
| <input type="checkbox"/>            | <input checked="" type="checkbox"/> Flow cytometry |
| <input checked="" type="checkbox"/> | <input type="checkbox"/> MRI-based neuroimaging    |

## Unique biological materials

Policy information about [availability of materials](#)

|                            |                                                                                                                                                              |
|----------------------------|--------------------------------------------------------------------------------------------------------------------------------------------------------------|
| Obtaining unique materials | Clones from the sequenced genotype 'Camarosa' are widely available to the community from nurseries around the world. Material is no longer patent protected. |
|----------------------------|--------------------------------------------------------------------------------------------------------------------------------------------------------------|

## Flow Cytometry

### Plots

Confirm that:

- The axis labels state the marker and fluorochrome used (e.g. CD4-FITC).
- The axis scales are clearly visible. Include numbers along axes only for bottom left plot of group (a 'group' is an analysis of identical markers).
- All plots are contour plots with outliers or pseudocolor plots.
- A numerical value for number of cells or percentage (with statistics) is provided.

## Methodology

### Sample preparation

Flow cytometry analyses were conducted by Dr. Arumuganathan in the Flow Cytometry and Imaging Core Laboratory at Virginia Mason Research Center in Seattle, Washington. The procedure used to analyze nuclear DNA content in plant cells was modified from Arumuganathan and Earle (1991). Briefly, the procedure consists of preparing suspensions of intact nuclei by chopping of 50 mg plant tissues in MgSO<sub>4</sub> buffer mixed with DNA standards and stained with propidium iodide (PI) in a solution containing DNAase-free-RNAase. Fluorescence intensities of the stained nuclei are measured by a flow cytometer. Values for nuclear DNA content are estimated by comparing fluorescence intensities of the nuclei of the test population with those of an appropriate internal DNA standard that is included with the tissue being tested. We use nuclei from Chicken Red blood cells (2.5 pg/2C), Glycine max (2.45 pg./2C), Oryza sativa cv Nipponbare (0.96 pg/ 2C), Arabidopsis thaliana (0.36 pg/2C) or Zea mays B73 (5.77 pg/2C) as the internal standard. The pellet is suspended by vortexing vigorously in 0.5 mL solution containing 10 mM MgSO<sub>4</sub>.7H<sub>2</sub>O, 50mM KCl, 5 mM Hepes, pH 8.0, 3 mM dithiothreitol, 0.1 mg / mL propidium iodide, 1.5 mg / mL DNAse free RNAse (Rhoche, Indionapolis, IN) and 0.25% Triton X-100. The suspended nuclei are withdrawn using a pipettor, filtered through 30- $\mu$ m nylon mesh, and incubated at 37 °C for 30 min before flow cytometric analysis. Suspensions of sample nuclei is spiked with suspension of standard nuclei (prepared in above solution) and analyzed with a FACScalibur flow cytometer (Becton-Dickinson, San Jose, CA). For each measurement, the propidium iodide fluorescence area signals (FL2-A) from 1000 nuclei are collected and analyzed by CellQuest software (Becton-Dickinson, San Jose, CA) on a Macintosh computer. The mean position of the G<sub>0</sub>/G<sub>1</sub> nuclei peak of the sample and the internal standard are determined by CellQuest software. The mean nuclear DNA content of each plant sample, measured in picograms, are based on 1000 scanned nuclei.

### Instrument

FACScalibur flow cytometer (Becton-Dickinson, San Jose, CA)

### Software

CellQuest software (Becton-Dickinson, San Jose, CA)

### Cell population abundance

The mean nuclear DNA content of each plant sample, measured in picograms, are based on 1000 scanned nuclei.

### Gating strategy

The mean position of the G<sub>0</sub>/G<sub>1</sub> nuclei peak of the sample and the internal standard are determined by CellQuest software. See supplemental images.

Tick this box to confirm that a figure exemplifying the gating strategy is provided in the Supplementary Information.
